# Supplementary material
Source: PubMed Central journal article supplement (PMC5516112)
Supplement: rstb20160403supp1.pdf [file rstb20160403supp1.pdf]

TM1
\* PtSLC4-1
\* PtSLC4-2
\* PtSLC4-4
\* PtSLC4-3
\* PtSLC4-5
\* PtSLC4-52bd
\* PtSLC4-6
\* PtSLC4-7
\* TpSLC4-1
\* TpSLC4-2
\* TpSLC4-3
\* hsSLC4A1
\* hsSLC4A4

TM2
PtSLC4-1
PtSLC4-2
PtSLC4-4
PtSLC4-3
PtSLC4-5
PtSLC4-52bd
PtSLC4-6
PtSLC4-7
TpSLC4-1
TpSLC4-2
TpSLC4-3
hsSLC4A1
hsSLC4A4

TM3
PtSLC4-1
PtSLC4-2
PtSLC4-4
PtSLC4-3
PtSLC4-5
PtSLC4-52bd
PtSLC4-6
PtSLC4-7
TpSLC4-1
TpSLC4-2
TpSLC4-3
hsSLC4A1
hsSLC4A4

TM4
PtSLC4-1
PtSLC4-2
PtSLC4-4
PtSLC4-3
PtSLC4-5
PtSLC4-52bd
PtSLC4-6
PtSLC4-7
TpSLC4-1
TpSLC4-2
TpSLC4-3
hsSLC4A1
hsSLC4A4

TM5
PtSLC4-1
PtSLC4-2
PtSLC4-4
PtSLC4-3
PtSLC4-5
PtSLC4-52bd
PtSLC4-6
PtSLC4-7
TpSLC4-1
TpSLC4-2
TpSLC4-3
hsSLC4A1
hsSLC4A4

TM6
PtSLC4-1
PtSLC4-2
PtSLC4-4
PtSLC4-3
PtSLC4-5
PtSLC4-52bd
PtSLC4-6
PtSLC4-7
TpSLC4-1
TpSLC4-2
TpSLC4-3
hsSLC4A1
hsSLC4A4

TM7
PtSLC4-1
PtSLC4-2
PtSLC4-4
PtSLC4-3
PtSLC4-5
PtSLC4-52bd
PtSLC4-6
PtSLC4-7
TpSLC4-1
TpSLC4-2
TpSLC4-3
hsSLC4A1
hsSLC4A4

TM8
PtSLC4-1
PtSLC4-2
PtSLC4-4
PtSLC4-3
PtSLC4-5
PtSLC4-52bd
PtSLC4-6
PtSLC4-7
TpSLC4-1
TpSLC4-2
TpSLC4-3
hsSLC4A1
hsSLC4A4

TM9
PtSLC4-1
PtSLC4-2
PtSLC4-4
PtSLC4-3
PtSLC4-5
PtSLC4-52bd
PtSLC4-6
PtSLC4-7
TpSLC4-1
TpSLC4-2
TpSLC4-3
hsSLC4A1
hsSLC4A4

TM10
PtSLC4-1
PtSLC4-2
PtSLC4-4
PtSLC4-3
PtSLC4-5
PtSLC4-52bd
PtSLC4-6
PtSLC4-7
TpSLC4-1
TpSLC4-2
TpSLC4-3
hsSLC4A1
hsSLC4A4

TM11
PtSLC4-1
PtSLC4-2
PtSLC4-4
PtSLC4-3
PtSLC4-5
PtSLC4-52bd
PtSLC4-6
PtSLC4-7
TpSLC4-1
TpSLC4-2
TpSLC4-3
hsSLC4A1
hsSLC4A4

TM12
PtSLC4-1
PtSLC4-2
PtSLC4-4
PtSLC4-3
PtSLC4-5
PtSLC4-52bd
PtSLC4-6
PtSLC4-7
TpSLC4-1
TpSLC4-2
TpSLC4-3
hsSLC4A1
hsSLC4A4

TM13
PtSLC4-1
PtSLC4-2
PtSLC4-4
PtSLC4-3
PtSLC4-5
PtSLC4-52bd
PtSLC4-6
PtSLC4-7
TpSLC4-1
TpSLC4-2
TpSLC4-3
hsSLC4A1
hsSLC4A4

TM14
PtSLC4-1
PtSLC4-2
PtSLC4-4
PtSLC4-3
PtSLC4-5
PtSLC4-52bd
PtSLC4-6
PtSLC4-7
TpSLC4-1
TpSLC4-2
TpSLC4-3
hsSLC4A1
hsSLC4A4
